# Supplementary material for: Simulated Fermentation of Strong-Flavor Baijiu through Functional Microbial Combination to Realize the Stable Synthesis of Important Flavor Chemicals
Source: MDPI journal article supplement (doi:10.3390/foods12030644), 2023-02-02
Supplement: s1 [file s1]

# Supplementary

## Simulated Fermentation of Strong-Flavor Baijiu through Functional Microbial Combination to Realize the Stable Synthesis of Important Flavor Chemicals

Youqiang Xu <sup>1,\*†</sup>, Mengqin Wu <sup>1,†</sup>, Dong Zhao <sup>2</sup>, Jia Zheng <sup>2</sup>, Mengqi Dai <sup>1</sup>, Xiuting Li <sup>3,4,\*</sup>, Weiwei Li <sup>1</sup>, Chengnan Zhang <sup>1</sup> and Baoguo Sun <sup>3,4</sup>

<sup>1</sup> School of Food and Health, Beijing Technology and Business University (BTBU), Beijing 100048, China

<sup>2</sup> Wuliangye Yibin Co., Ltd. Yibin 644000, China

<sup>3</sup> Key Laboratory of Brewing Microbiome and Enzymatic Molecular Engineering, China General Chamber of Commerce, Beijing 102401, China

<sup>4</sup> Key Laboratory of Brewing Molecular Engineering of China Light Industry, Beijing Technology and Business University, Beijing 100048, China

\* Correspondence: xuyouqiang@btbu.edu.cn (Y.X.); lixt@btbu.edu.cn (X.L.)

† These authors contributed equally to this work.

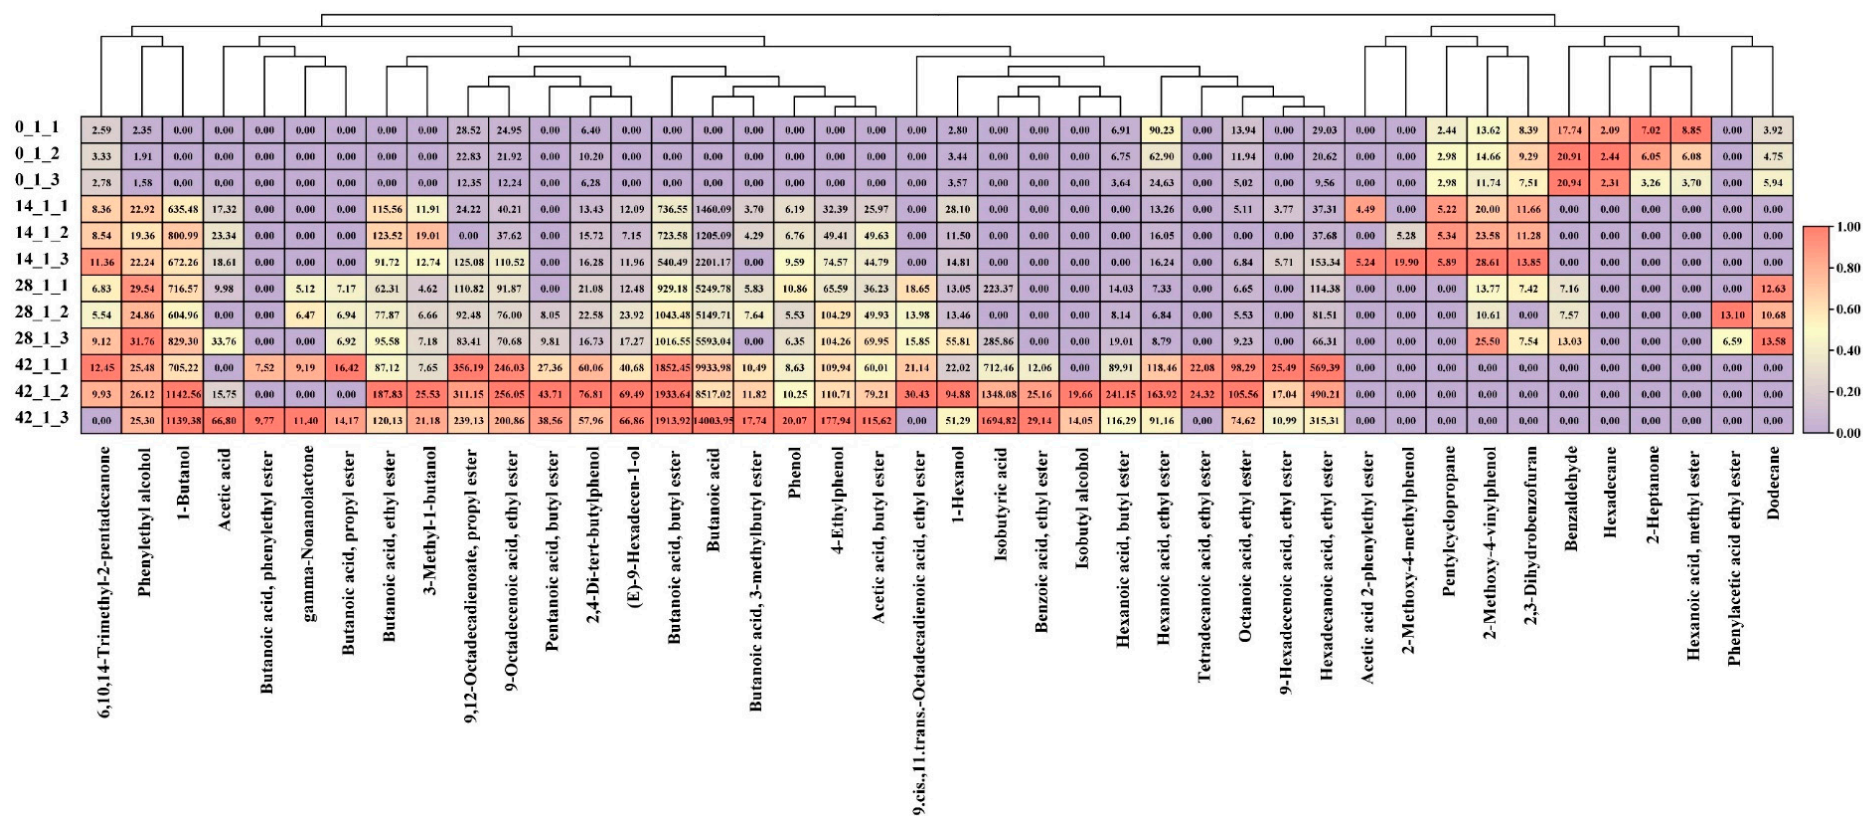

**Figure S1.** Heatmap analysis of flavor compounds in fermented grains of sample 1.

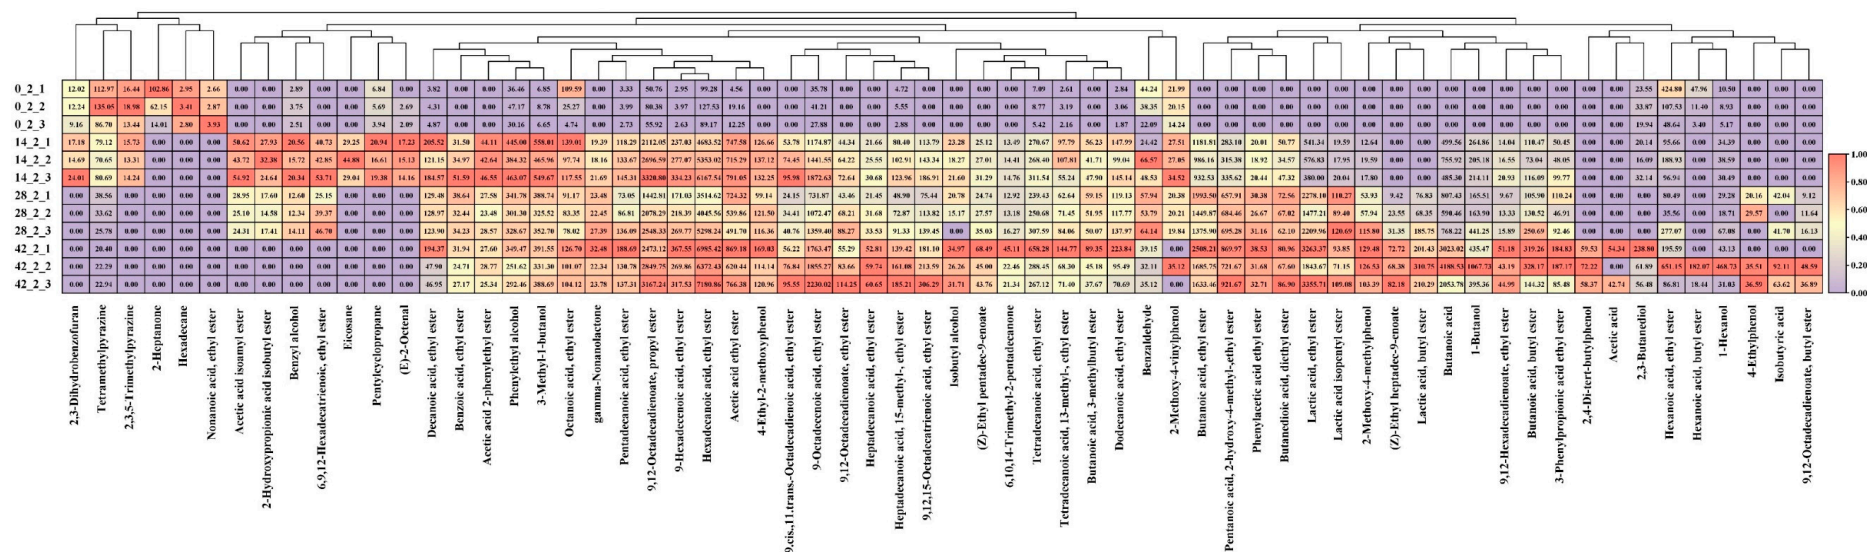

**Figure S2.** Heatmap analysis of flavor compounds in fermented grains of sample 2.

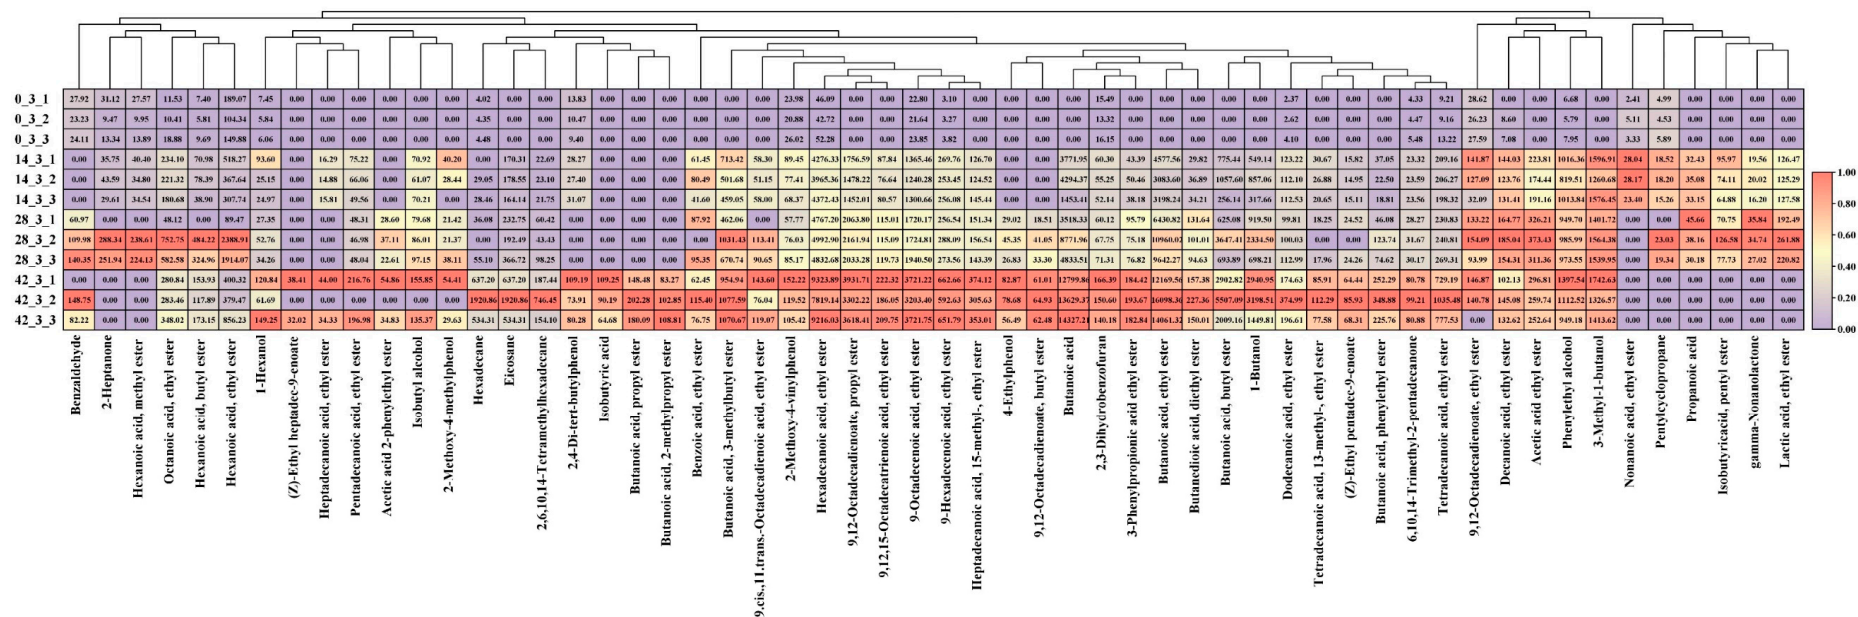

**Figure S3.** Heatmap analysis of flavor compounds in fermented grains of sample 3.



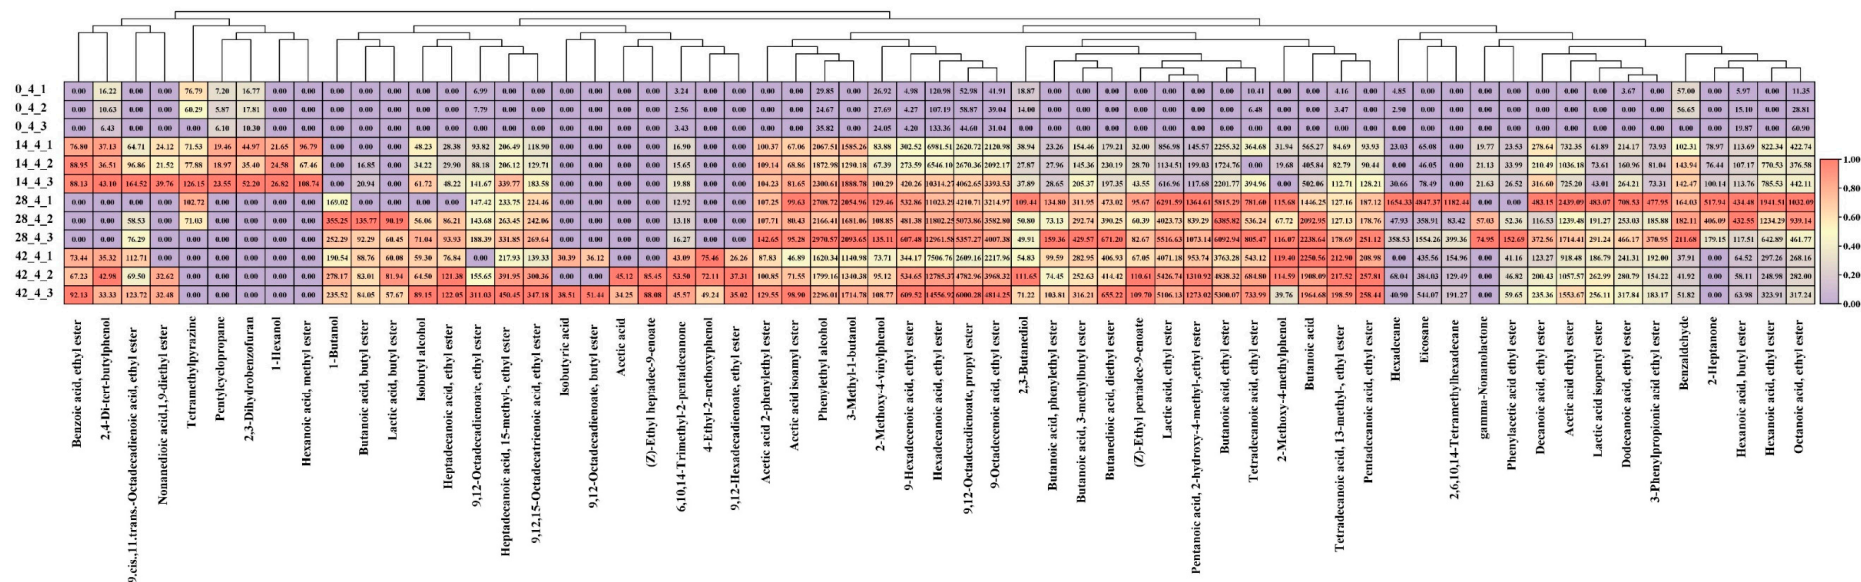

**Figure S4.** Heatmap analysis of flavor compounds in fermented grains of sample 4.

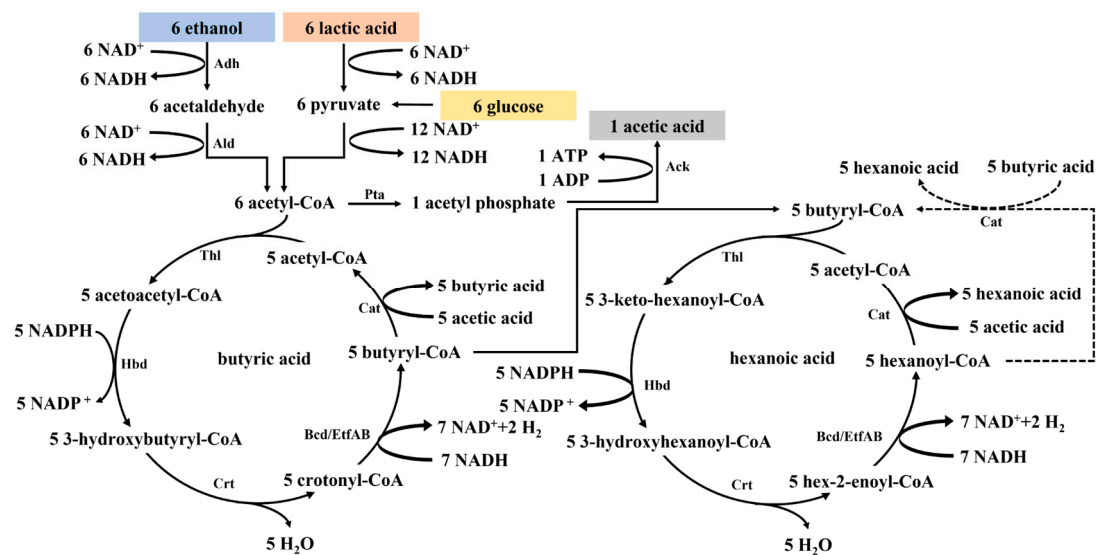

**Figure S5.** Synthetic pathways of fatty acids acetic acid, butyric acid and hexanoic acid.

**Table S1.** Relative concentrations of flavor compounds of all samples during fermentation (µg/kg).

| Flavor compounds <sup>a</sup>                      | 1_0            | 1_14               | 1_28              | 1_42                 | 2_0             | 2_14               | 2_28               | 2_42                | 3_0             | 3_14                | 3_28                | 3_42                 | 4_0             | 4_14               | 4_28               | 4_42                |
|----------------------------------------------------|----------------|--------------------|-------------------|----------------------|-----------------|--------------------|--------------------|---------------------|-----------------|---------------------|---------------------|----------------------|-----------------|--------------------|--------------------|---------------------|
| Phenylethyl alcohol                                | 1.95±0.39      | 21.51±<br>1.89     | 28.72±<br>3.52    | 25.63±<br>0.43       | 37.93±<br>8.60  | 430.80±<br>41.25   | 323.91±<br>20.66   | 297.85±<br>49.15    | 6.81±1.08       | 949.90±<br>112.93   | 969.75±<br>18.44    | 1153.08±<br>226.91   | 30.11±<br>5.58  | 2080.37±<br>214.10 | 2615.23±<br>410.15 | 1905.17±<br>350.09  |
| Benzaldehyde                                       | 19.86±<br>1.84 | ND                 | 9.25±3.28         | ND                   | 34.89±<br>11.47 | 46.51±<br>21.15    | 58.62±<br>5.21     | 35.46±<br>3.53      | 25.08±<br>2.49  | ND                  | 103.76±<br>40.05    | 76.99±<br>74.51      | 37.88±<br>32.81 | 129.57±<br>23.62   | 185.94±<br>24.05   | 43.89±<br>7.16      |
| Butanoic acid                                      | ND             | 1622.12±<br>517.43 | 5330.85±          | 10818.32<br>±2848.36 | ND              | 580.26±<br>152.29  | 722.04±<br>115.62  | 3088.44±<br>1068.88 | ND              | 3173.24±<br>1512.15 | 5707.93±<br>2733.79 | 13585.48<br>±764.62  | ND              | 491.06±<br>80.28   | 1925.95±<br>421.77 | 2041.11±<br>183.58  |
| Isobutyric acid                                    | ND             | ND                 | 169.74±<br>150.28 | 1251.79±<br>498.21   | ND              | ND                 | 27.91±<br>24.17    | 51.91±<br>47.16     | ND              | ND                  | ND                  | 88.04±<br>22.36      | ND              | ND                 | ND                 | 22.97±<br>20.30     |
| 2-Heptanone                                        | 5.45±1.96      | ND                 | ND                | ND                   | 59.67±<br>44.48 | ND                 | ND                 | ND                  | 17.98±<br>11.55 | 36.32±<br>7.01      | 180.09±<br>157.02   | ND                   | ND              | 85.18±<br>13.02    | 367.73±<br>172.62  | ND                  |
| 6,10,14-Trimethyl-2-pentadecanone                  | 2.90±0.39      | 9.42±1.68          | 7.16±1.82         | 7.46±6.58            | ND              | 14.22±<br>0.65     | 14.12±<br>1.86     | 29.64±<br>13.41     | 4.76±0.63       | 23.49±<br>0.15      | 30.04±<br>1.70      | 86.96±<br>10.61      | 3.08±0.46       | 17.47±<br>2.17     | 14.12±<br>1.86     | 47.39±<br>5.44      |
| Hexadecane                                         | 2.28±0.18      | ND                 | ND                | ND                   | 3.05±0.32       | ND                 | ND                 | ND                  | 4.28±0.24       | 19.17±<br>16.6      | 30.39±<br>27.98     | 1030.79±<br>772.53   | 2.59±2.44       | 17.89±<br>15.96    | 686.93±<br>852.07  | 36.31±<br>34.25     |
| Pentylcyclopropane                                 | 2.80±0.31      | 5.48±0.36          | ND                | ND                   | 5.49±1.46       | 18.98±<br>2.19     | ND                 | ND                  | 5.13±0.69       | 17.32±<br>1.80      | 14.12±<br>12.37     | ND                   | 6.39±0.71       | 20.66±<br>2.51     | ND                 | ND                  |
| 9,12-Octadecadienoate, propyl ester                | 21.23±<br>8.20 | 49.76±<br>66.34    | 95.57±<br>13.96   | 302.16±<br>59.05     | 62.35±<br>15.82 | 2709.82±<br>604.48 | 2023.15±<br>554.82 | 2830.04±<br>347.48  | ND              | 1562.27±<br>168.79  | 2086.34±<br>67.23   | 3617.45±<br>314.75   | 52.15±<br>7.17  | 3117.91±<br>818.55 | 4880.61±<br>597.21 | 4464.13±<br>1717.90 |
| 9.cis.,11.trans.-Octadecadienoic acid, ethyl ester | ND             | ND                 | 16.16±<br>2.35    | 17.19±<br>15.60      | ND              | 74.74±<br>21.10    | 33.11±<br>8.38     | 76.20±<br>19.67     | ND              | 55.82±<br>4.05      | 68.02±<br>60.00     | 112.90±<br>34.20     | ND              | 108.70±<br>50.95   | 44.94±<br>39.92    | 101.97±<br>28.66    |
| 9-Hexadecenoic acid, ethyl ester                   | ND             | 3.16±2.90          | ND                | 17.84±<br>7.28       | 3.18±0.70       | 282.78±<br>48.85   | 219.73±<br>49.38   | 318.32±<br>48.85    | 3.40±0.38       | 259.76±<br>8.76     | 272.73±<br>15.79    | 635.69±<br>37.68     | 4.48±0.43       | 332.12±<br>77.69   | 540.57±<br>63.41   | 496.11±<br>136.81   |
| Isobutyl alcohol                                   | ND             | ND                 | ND                | 11.24±<br>10.13      | ND              | 21.05±<br>2.55     | 11.98±<br>10.75    | 30.98±<br>4.40      | ND              | 67.40±<br>5.49      | 87.61±<br>8.85      | 97.07±<br>84.69      | ND              | 48.06±<br>13.75    | 42.37±<br>37.45    | 70.98±<br>15.95     |
| gamma-Nonanolactone                                | ND             | ND                 | 3.86±3.41         | 6.86±6.04            | ND              | 19.74±<br>1.79     | 24.44±<br>2.61     | 26.20±<br>5.49      | ND              | 18.59±<br>2.09      | 32.53±<br>4.80      | ND                   | ND              | 20.84±<br>0.96     | 43.99±<br>39.14    | ND                  |
| Benzoic acid, ethyl ester                          | ND             | ND                 | ND                | 22.12±<br>8.94       | ND              | 39.36±<br>10.74    | 35.10±<br>3.19     | 27.94±<br>3.67      | ND              | 61.18±<br>19.45     | 61.09±<br>53.04     | 84.87±<br>27.39      | ND              | 84.63±<br>6.79     | ND                 | 77.60±<br>12.96     |
| Butanoic acid, butyl ester                         | ND             | 666.87±<br>109.65  | 996.41±<br>59.75  | 1900.01±<br>42.35    | ND              | 99.87±<br>23.40    | 162.37±<br>77.47   | 263.92±<br>103.67   | ND              | 696.39±<br>406.54   | 1655.46±<br>1817.34 | 3473.03±<br>14109.75 | ND              | 12.6±<br>11.10     | 76.02±<br>69.33    | 85.27±<br>3.07      |
| Butanoic acid, ethyl ester                         | ND             | 110.27±<br>16.55   | 78.58±<br>16.64   | 131.70±<br>51.34     | ND              | 1033.50±<br>131.21 | 1606.42±<br>337.25 | 1942.47±<br>490.64  | ND              | 3619.80±<br>831.42  | 9011.04±<br>2329.65 | ±1964.85             | ND              | 2060.62±<br>292.09 | 6098.02±<br>285.30 | 4633.89±<br>788.53  |
| Butanoic acid, 3-methylbutyl ester                 | ND             | 2.66±2.33          | 4.49±3.99         | 13.35±<br>3.86       | ND              | 48.61±<br>7.28     | 53.72±<br>4.79     | 57.40±<br>27.92     | ND              | 558.05±<br>136.24   | 721.41±<br>288.05   | 1034.40±<br>68.90    | ND              | 168.40±<br>32.34   | 344.75±<br>74.08   | 283.93±<br>31.80    |
| 9-Octadecenoic acid, ethyl ester                   | 19.70±<br>6.64 | 62.79±<br>41.36    | 79.51±<br>11.02   | 234.31±<br>29.40     | 34.95±<br>6.70  | 1496.35±<br>352.10 | 1054.58±<br>314.15 | 1949.59±<br>247.16  | 22.76±<br>1.11  | 1302.13±<br>62.60   | 1795.16±<br>125.89  | 3548.79±<br>299.11   | 37.33±<br>5.63  | 2535.56±<br>743.16 | 3601.72±<br>396.54 | 3666.84±<br>1324.14 |
| Hexanoic acid, butyl                               | 5.77±1.85      | ND                 | 13.73±            | 149.12±              | 20.92±          | ND                 | ND                 | 66.84±              | 7.63±1.95       | 62.75±              | 269.73±             | 148.32±              | 13.65±          | 111.54±            | 328.18±            | 62.20±              |

|                                             |             |              |               |               |               |                |                |                |              |                |                 |                |              |      |                 |                 |                  |
|---------------------------------------------|-------------|--------------|---------------|---------------|---------------|----------------|----------------|----------------|--------------|----------------|-----------------|----------------|--------------|------|-----------------|-----------------|------------------|
| ester                                       |             |              |               | 5.44          | 80.79         | 23.75          |                |                | 100.22       |                | 20.99           | 246.79         | 28.06        | 7.06 | 3.79            | 182.44          | 3.56             |
| Hexanoic acid, ethyl ester                  | 59.25±32.95 | 15.18±1.67   | 7.65±1.01     | 124.51±36.76  | 193.65±202.33 | 127.18±53.48   | 131.04±128.45  | 311.18±299.40  | 147.77±42.40 | 397.88±108.47  | 1464.15±1213.95 | 545.34±269.44  | ND           |      | 792.80±26.66    | 1272.90±650.17  | 290.05±37.99     |
| Tetradecanoic acid, ethyl ester             | ND          | ND           | ND            | 15.47±13.44   | 7.09±1.67     | 283.54±24.28   | 265.90±36.54   | 404.62±219.94  | 10.53±2.33   | 204.58±5.62    | 246.98±19.97    | 847.40±164.67  | 5.63±5.26    |      | 253.21±219.81   | 707.77±149.03   | 653.97±99.10     |
| Octanoic acid, ethyl ester                  | 10.30±4.68  | 3.99±3.56    | 7.14±1.89     | 92.82±16.18   | 46.53±55.56   | 118.10±20.64   | 84.18±6.61     | 110.63±14.00   | 13.61±4.60   | 212.04±27.90   | 461.15±367.67   | 304.11±38.05   | 33.69±25.13  |      | 413.81±33.66    | 811.00±305.99   | 289.13±25.31     |
| 3-Methyl-1-butanol                          | ND          | 14.55±3.88   | 6.15±1.36     | 18.12±9.33    | 7.43±1.18     | 524.55±50.91   | 355.65±31.71   | 370.51±33.99   | ND           | 1478.01±188.49 | 1502.02±87.72   | 1494.27±219.44 | ND           |      | 1588.07±299.31  | 1943.23±227.86  | 1398.71±291.31   |
| Acetic acid 2-phenylethyl ester             | ND          | 3.24±2.83    | ND            | ND            | ND            | 44.44±1.98     | 26.54±2.70     | 27.23±1.74     | ND           | ND             | 29.44±7.29      | 29.90±27.76    | ND           |      | 104.58±4.39     | 119.20±20.31    | 106.08±21.35     |
| Hexadecanoic acid, ethyl ester              | 19.74±9.77  | 76.11±66.88  | 87.40±24.57   | 458.31±130.01 | 105.33±19.88  | 5401.36±743.19 | 4286.14±915.82 | 6846.23±421.80 | 47.03±4.85   | 4204.71±212.77 | 4864.26±116.12  | 8786.35±839.36 | 120.51±13.09 |      | 7947.29±2061.39 | 11929.04±975.34 | 11616.35±3667.58 |
| 2-Methoxy-4-vinylphenol                     | 13.34±1.48  | 24.06±4.32   | 16.63±7.85    | ND            | 18.79±4.05    | 29.69±4.18     | 20.14±0.27     | 11.71±20.28    | 23.63±2.59   | 78.41±10.58    | 72.99±13.95     | 125.72±24.01   | 26.22±1.92   |      | 83.85±16.45     | 124.48±13.82    | 92.53±17.67      |
| 1-Butanol                                   | ND          | 702.91±86.91 | 716.95±112.17 | 995.72±251.59 | ND            | 228.05±32.19   | 256.89±159.66  | 632.85±377.15  | ND           | 574.62±270.60  | 1317.40±887.75  | 2529.76±944.09 | ND           |      | ND              | 258.85±93.29    | 234.74±43.82     |
| 1-Hexanol                                   | 3.27±0.41   | 18.14±8.79   | 27.44±24.57   | 56.06±36.66   | 8.20±2.74     | 34.49±4.05     | 38.36±25.43    | 180.96±249.29  | 6.45±0.87    | 47.91±39.57    | 38.12±13.14     | 110.59±44.67   | ND           |      | 24.35±2.60      | ND              | ND               |
| 2,4-Di-tert-butylphenol                     | 7.62±2.23   | 15.14±1.51   | 20.13±3.04    | 64.94±10.33   | ND            | ND             | ND             | 63.37±7.68     | 11.23±2.31   | 28.91±1.92     | ND              | 87.79±18.80    | 11.09±4.91   |      | 38.91±3.64      | ND              | 37.21±5.10       |
| 2-Methoxy-4-methylphenol                    | ND          | 8.39±10.31   | ND            | ND            | ND            | 16.68±3.61     | 75.89±34.62    | 119.80±14.29   | ND           | 22.88±20.67    | 26.97±9.65      | 28.01±27.24    | ND           |      | 17.21±16.11     | 99.82±27.81     | 91.25±44.65      |
| 4-Ethylphenol                               | ND          | 52.12±21.22  | 91.38±22.33   | 132.86±39.04  | ND            | ND             | 16.58±15.11    | 24.03±20.82    | ND           | ND             | 33.73±10.12     | 72.68±14.17    | ND           |      | ND              | ND              | ND               |
| 2,3-Dihydrobenzofuran                       | 8.39±0.89   | 12.27±1.39   | 4.98±4.32     | ND            | 11.14±1.72    | 18.63±4.82     | ND             | ND             | 14.99±1.48   | 55.90±4.12     | 66.39±5.72      | 152.39±13.20   | 14.96±4.07   |      | 44.19±8.43      | ND              | ND               |
| Acetic acid                                 | ND          | 19.76±3.17   | 14.58±17.34   | 27.52±34.92   | ND            | ND             | ND             | 32.36±28.62    | ND           | ND             | ND              | ND             | ND           |      | ND              | ND              | 26.46±23.55      |
| Phenylacetic acid ethyl ester               | ND          | ND           | 6.57±6.55     | ND            | ND            | 19.79±0.79     | 29.40±2.40     | 34.31±3.70     | ND           | ND             | ND              | ND             | ND           |      | 28.01±5.39      | 68.35±77.59     | 49.21±9.47       |
| Hexanoic acid, methyl ester                 | 6.21±2.58   | ND           | ND            | ND            | ND            | ND             | ND             | ND             | 17.14±9.25   | 36.58±3.31     | 154.25±133.78   | ND             | ND           |      | 91.00±21.24     | ND              | ND               |
| Butanoic acid, phenylethyl ester            | ND          | ND           | ND            | 5.77±5.12     | ND            | ND             | ND             | ND             | ND           | 26.12±9.65     | 81.48±39.28     | 275.64±64.80   | ND           |      | 26.62±2.93      | 122.43±44.43    | 92.62±15.88      |
| Heptadecanoic acid, 15-methyl-, ethyl ester | ND          | ND           | ND            | ND            | 4.38±1.36     | 102.42±21.79   | 71.04±21.27    | 161.9±22.91    | ND           | 132.22±11.50   | 150.42±6.62     | 344.25±35.08   | ND           |      | 250.79±77.06    | 276.35±50.31    | 353.44±120.95    |
| Decanoic acid, ethyl ester                  | ND          | ND           | ND            | ND            | 4.33±0.52     | 170.41±43.93   | 127.45±3.09    | 96.41±84.84    | 5.23±4.59    | 133.06±10.23   | 168.04±15.63    | 126.61±22.10   | ND           |      | 268.58±53.77    | 324.08±188.05   | 186.35±57.35     |
| Lactic acid, ethyl ester                    | ND          | ND           | ND            | ND            | ND            | 499.39±104.90  | 1988.42±444.03 | 2820.91±847.58 | ND           | 126.45±1.14    | 225.06±34.89    | ND             | ND           |      | 869.49±259.00   | 5277.32±1152.71 | 4868.01±708.45   |





|                                        |           |             |             |             |            |            |              |              |    |             |             |               |    |             |               |              |
|----------------------------------------|-----------|-------------|-------------|-------------|------------|------------|--------------|--------------|----|-------------|-------------|---------------|----|-------------|---------------|--------------|
| Hexadecadienoate, ethyl ester          |           |             |             |             |            | 3.48       | 3.13         | 4.19         |    |             |             |               |    |             |               | 5.84         |
| Lactic acid, butyl ester               | ND        | ND          | ND          | ND          | ND         | ND         | 110.31±65.47 | 240.82±60.72 | ND | ND          | ND          | ND            | ND | ND          | 50.21±45.96   | 66.56±13.37  |
| Lactic acid isopentyl ester            | ND        | ND          | ND          | ND          | ND         | 19.19±1.10 | 106.79±15.94 | 91.36±19.09  | ND | ND          | ND          | ND            | ND | 59.50±15.44 | 321.86±148.29 | 235.30±42.15 |
| Acetic acid isoamyl ester              | ND        | ND          | ND          | ND          | ND         | 49.75±5.65 | 26.12±2.48   | ND           | ND | ND          | ND          | ND            | ND | 72.52±7.95  | 91.78±10.07   | 72.45±26.02  |
| 2,6,10,14-Tetramethylhexadecane        | ND        | ND          | ND          | ND          | ND         | ND         | ND           | ND           | ND | 22.51±0.69  | 67.37±28.06 | 362.66±332.79 | ND | ND          | 555.07±565.81 | 158.57±31.05 |
| Phenol                                 | ND        | 7.51±1.82   | 7.58±2.87   | 12.99±6.19  | ND         | ND         | ND           | ND           | ND | ND          | ND          | ND            | ND | ND          | ND            | ND           |
| (E)-9-Hexadecen-1-ol                   | ND        | 10.40±2.82  | 17.89±5.75  | 59.01±15.93 | ND         | ND         | ND           | ND           | ND | ND          | ND          | ND            | ND | ND          | ND            | ND           |
| Dodecane                               | 4.87±1.02 | ND          | 12.30±1.48  | ND          | ND         | ND         | ND           | ND           | ND | ND          | ND          | ND            | ND | ND          | ND            | ND           |
| Pentanoic acid, butyl ester            | ND        | ND          | 5.95±5.23   | 36.54±8.36  | ND         | ND         | ND           | ND           | ND | ND          | ND          | ND            | ND | ND          | ND            | ND           |
| Acetic acid, butyl ester               | ND        | 40.13±12.50 | 52.04±16.96 | 84.95±28.25 | ND         | ND         | ND           | ND           | ND | ND          | ND          | ND            | ND | ND          | ND            | ND           |
| Benzyl alcohol                         | ND        | ND          | ND          | ND          | 3.05±0.63  | 18.87±2.74 | 13.01±0.96   | ND           | ND | ND          | ND          | ND            | ND | ND          | ND            | ND           |
| 2,3,5-Trimethylpyrazine                | ND        | ND          | ND          | ND          | 16.29±2.77 | 14.43±1.22 | ND           | ND           | ND | ND          | ND          | ND            | ND | ND          | ND            | ND           |
| (E)-2-Octenal                          | ND        | ND          | ND          | ND          | 1.59±1.41  | 15.51±1.57 | ND           | ND           | ND | ND          | ND          | ND            | ND | ND          | ND            | ND           |
| 6,9,12-Hexadecatrienoic, ethyl ester   | ND        | ND          | ND          | ND          | ND         | 45.76±6.96 | 37.07±10.96  | ND           | ND | ND          | ND          | ND            | ND | ND          | ND            | ND           |
| 2-Hydroxypropionic acid isobutyl ester | ND        | ND          | ND          | ND          | ND         | 28.32±3.88 | 16.53±1.69   | ND           | ND | ND          | ND          | ND            | ND | ND          | ND            | ND           |
| Propanoic acid                         | ND        | ND          | ND          | ND          | ND         | ND         | ND           | ND           | ND | 33.55±1.37  | 38.00±7.74  | ND            | ND | ND          | ND            | ND           |
| Butanoic acid, 2-methylpropyl ester    | ND        | ND          | ND          | ND          | ND         | ND         | ND           | ND           | ND | ND          | ND          | 98.31±13.36   | ND | ND          | ND            | ND           |
| Isobutyric acid, pentyl ester          | ND        | ND          | ND          | ND          | ND         | ND         | ND           | ND           | ND | 78.32±15.97 | 91.69±30.42 | ND            | ND | ND          | ND            | ND           |
| Nonanedioic acid, 1,9-diethyl ester    | ND        | ND          | ND          | ND          | ND         | ND         | ND           | ND           | ND | ND          | ND          | ND            | ND | 28.47±9.86  | ND            | 21.70±18.79  |

<sup>a</sup> ND means not detected.
